# Supplementary material
Source: Elsevier journal article supplement (https://www.sciencedirect.com/science/article/pii/S2531137920300250)
Supplement: mmc1 [file S2531137920300250:mmc1.docx]

**Supplementary information.**


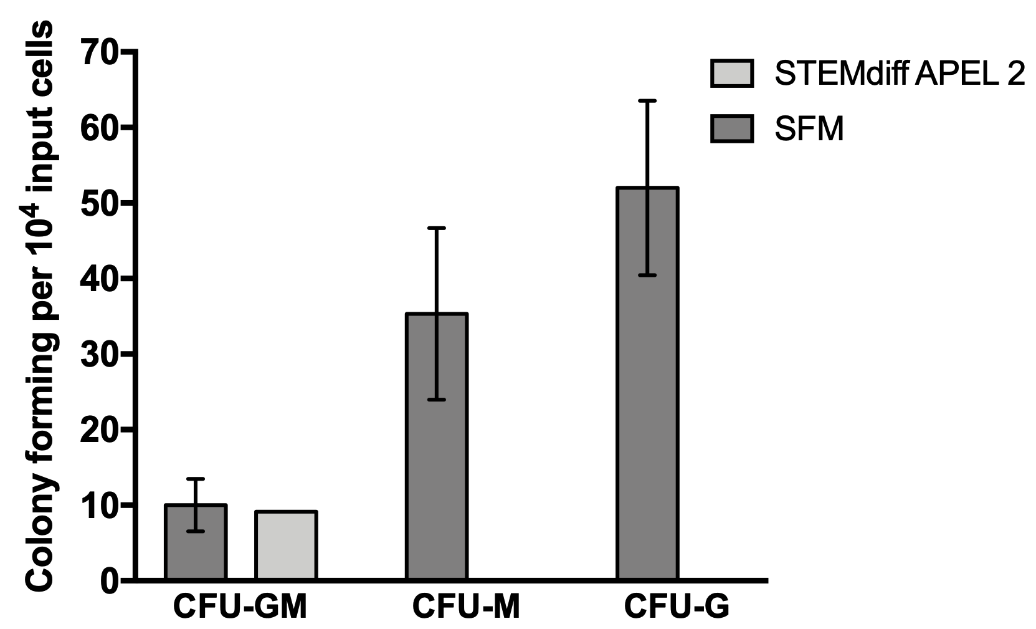


**Figure S1 Cells cultured with SFM and STEMdiff APEL 2 medium were plated in methylcellulose medium.** Colonies with granulocyte-macrophage progenitor cells CFU-GM, macrophage progenitors CFU-M and granulocyte progenitor cells CFU-G were numerated.
